# Supplementary material for: PYCNOIB: Biodiversity and Biogeography of Iberian Pycnogonids
Source: PLoS One. 2015 Mar 17;10(3):e0120818. doi: 10.1371/journal.pone.0120818 (PMC4363526; doi:10.1371/journal.pone.0120818)
Supplement: S1 Table — New data included the following surveys: Dragoneres (Balearic Islands, N = 63), DIVA-Artabria (N = 72), the Museo Bocage collection (Portugal, N = 167), El Cachucho (Le Danois Bank, N = 12) and INSUB (N = 83). Data derived from the PhD of Munilla [12] (N = 8508) and Soler-Membrives [15] (N = 3182) not published elsewhere are also considered new data. References [56–72] are also included in the reference list. (DOCX) [file pone.0120818.s002.docx]

| **Table S2.** References and new data by species and zone. New data included the following surveys: Dragoneres (Balearic Islands), DIVA-Artabria, the Museo Bocage collection (Portugal), El Cachucho (Le Danois Bank) and INSUB. Data derived from the PhD of Munilla [12] and Soler-Membrives [15] not published elsewhere are also considered new data.   | **Species** | **ATL** | **MED** | **GIB** | | --- | --- | --- | --- | | *Achelia echinata* Hodge, 1864 | [22,23,24,25,28,29,61,62,63]INSUB, Bocage | [11,12,13,14,15,16,17,18,19,20,21,22,36,64,65,66,67,68]INSUB, Dragoneres | [17,27,36,69]INSUB | | *Achelia langi* (Dohrn, 1881) | [23,24,29]Bocage | [11,12,13,14,16,18,21,68] | [27] | | *Achelia vulgaris* (Costa, 1861) | [23,24,25,63]Bocage | [11,12,13,14,15,17,18,22,64,65,68] | [17] | | *Ammothella appendiculata* (Dohrn, 1881) |  | [11,14,18,67,68] |  | | *Ammothella biunguiculata* (Dohrn, 1881) |  | [12,13,68] | [17] | | *Ammothella gibraltarensis* Munilla, 1993 |  |  | [17] | | *Ammothella longioculata* (Faraggiana, 1940) |  | [18] |  | | *Ammothella longipes* (Hodge, 1864) | [22,23,24,25,61,62,63]INSUB, Bocage | [11,12,14,15,16,18,19,20,21,64,65,66,67,68] | [17,27,36,69] | | *Ammothella tubicen* Stock, 1978 | [50] |  |  | | *Ammothella uniunguiculata* (Dohrn, 1881) |  | [11,14,15,16,18,64,66] | [27] | | *Anoplodactylus angulatus* (Dohrn, 1881) | [25,63]INSUB | [11,12,13,14,15,17,18,22,68]INSUB | [17,27] | | *Anoplodactylus arnaudae* Stock, 1978 | [28,70] |  | [28] | | *Anoplodactylus nanus* Krapp, Kocak & Kagatan, 2008 |  | [15] |  | | *Anoplodactylus oculatus* Carpenter, 1905 | Bocage |  |  | | *Anoplodactylus petiolatus* (Krøyer, 1844) | [22,23,24,25,26,28,29,50,62,63]INSUB, Bocage, DIVA-Artabria | [11,18,19,20,65,68] | [17,28] | | *Anoplodactylus pygmaeus* (Hodge, 1864) | [24,25,29,63]Bocage | [12,13,14,16,17,18,67,68] | [27] | | *Anoplodactylus robustus* (Dohrn, 1881) |  | [17,68] |  | | *Anoplodactylus typhlops* Sars, 1888 | [28]Cacucho, DIVA-Artabria |  |  | | *Anoplodactylus virescens* (Hodge, 1864) | [22,23,24,25,61,62,63]INSUB, Bocage | [11,15,18,65,68] | [27] | | *Ascorhynchus abyssi* Sars, 1877 | [23] |  |  | | *Ascorhynchus castelli* (Dohrn, 1881) | INSUB | [20,68] |  | | *Ascorhynchus pudicus* Stock, 1970 | [70] |  | [28] | | *Ascorhynchus simile* Fage, 1942 | [22]INSUB | [14,68] |  | | *Ascorhynchus turritus* Stock, 1978 | [50] |  |  | | *Austrodecus conifer* Stock, 1991 | [50] |  |  | | *Bathypallenopsis juttingae* (Stock, 1964) | [26] |  |  | | *Bathypallenopsis longirostris* (Wilson, 1881) | [26,71] |  |  | | *Bathypallenopsis scoparia* (Fage, 1956) | [26] | [22] | [28] | | *Callipallene brevirostris* (Johnston, 1837) | [23,24,29] | [13,18,28] |  | | *Callipallene emaciata* (Dohrn, 1881) | [23,24,25,28,29,62]Bocage | [11,12,15,16,18,22,64,65,68]Dragoneres | [17,27,36] | | *Callipallene phantoma* (Dohrn, 1881) | [28]Cachucho | [12,13,18,20,22]INSUB |  | | *Callipallene producta* (Sars, 1881) | [28]Cachucho, DIVA-Artabria | [12,16,17,18,19,20,28,68] | [28] | | *Callipallene spectrum* (Dohrn, 1881) | [29] | [11,18,19,20,68]Dragoneres | [17] | | *Callipallene tiberi* (Dohrn, 1881) | [22,28,69]INSUB | [16,18,19,65] | [17,28]INSUB | | *Cilunculus alcicornis* Stock, 1978 | [70]Cachucho |  |  | | *Cilunculus europaeus* Stock, 1978 | [28,50,70]Cachucho |  |  | | *Colossendeis angusta* Sars, 1877 | [28,71] |  |  | | *Colossendeis arcuata* Milne-Edwards, 1885 | [28,51] |  |  | | *Colossendeis clavata,* Meinert, 1899 | [51,71] |  |  | | *Colossendeis colossea* Wilson, 1881 | [23,24,28,51,70,71] |  |  | | *Colossendeis macerrima* Wilson, 1881 | [28,51,70,71] |  |  | | *Endeis charybdaea* (Dohrn, 1881) | [69] | [68] |  | | *Endeis spinosa* (Montagu, 18808) | [23,24,25,29,62,63,69]INSUB, Bocage | [11,14,15,18,19,20,22,65,68] | [17,27,36] | | *Hannonia stocki* Munilla, 1993 |  |  | [17] | | *Hedgpethia atlantica* (Stock, 1970) | [70] |  | [28] | | *Nymphon caldarium* Stock, 1987 |  |  | [28] | | *Nymphon gracile* Leach, 1814 | [22,23,24,29,62,69,72]Bocage, Cachucho | [11,12,13,14,64,68] | [27] | | *Nymphon laterospinum* Stock, 1963 | [50] |  |  | | *Nymphon macrum* Wilson, 1880 | [23,24] |  |  | | *Nymphon puellula* Krapp, 1973 |  |  | INSUB | | *Nymphon tricuspidatus* Soler-Membrives & Munilla, 2011 | Cachucho, DIVA-Artabria |  |  | | *Nymphon tubiferum* Stock, 1978 | [50] |  |  | | *Nymphonella tapetis* Ohshima, 1927 |  | [11,65,68] |  | | *Pantopipetta armoricana* Stock, 1978 | [50,70]DIVA-Artabria |  |  | | *Paranymphon spinosum* Caullery, 1896 | [23,24,26,28,50]INSUB, DIVA-Artabria |  | [68] | | *Pentapycnon geayi* Bouvier, 1911 |  |  | [17] | | *Pycnogonum litorale* (Strom, 1762) |  | [16,68] |  | | *Pycnogonum nodulosum* Dohrn, 1881 | [23,24,26,69]Cachucho |  |  | | *Pycnogonum plumipes* Stock, 1960 |  | [11,12,13,14,15,17,19,20,22,68] |  | | *Pycnogonum pusillum* Dohrn, 1881 |  | [68] |  | | *Rhynchothorax mediterraneus* Costa, 1861 |  | [22] | [28] | | *Rhynchothorax voxorinus* Stock, 1966 |  | [68] |  | | *Tanystylum conirostre* (Dohrn, 1881) | [22,23,24,63]INSUB, Bocage | [14,16,18,19,20,22,64,65,66,67,69]Dragoneres | [17,27,36]INSUB | | *Tanystylum orbiculare* Wilson, 1878 | [23,24] | [11,14,15,18,20,21,64,68] |  | | *Neotrygaeus communis* Dohrn, 1881 |  | [11,18,21,22,64,68] |  | |
| --- | --- | --- | --- | --- | --- | --- | --- | --- | --- | --- | --- | --- | --- | --- | --- | --- | --- | --- | --- | --- | --- | --- | --- | --- | --- | --- | --- | --- | --- | --- | --- | --- | --- | --- | --- | --- | --- | --- | --- | --- | --- | --- | --- | --- | --- | --- | --- | --- | --- | --- | --- | --- | --- | --- | --- | --- | --- | --- | --- | --- | --- | --- | --- | --- | --- | --- | --- | --- | --- | --- | --- | --- | --- | --- | --- | --- | --- | --- | --- | --- | --- | --- | --- | --- | --- | --- | --- | --- | --- | --- | --- | --- | --- | --- | --- | --- | --- | --- | --- | --- | --- | --- | --- | --- | --- | --- | --- | --- | --- | --- | --- | --- | --- | --- | --- | --- | --- | --- | --- | --- | --- | --- | --- | --- | --- | --- | --- | --- | --- | --- | --- | --- | --- | --- | --- | --- | --- | --- | --- | --- | --- | --- | --- | --- | --- | --- | --- | --- | --- | --- | --- | --- | --- | --- | --- | --- | --- | --- | --- | --- | --- | --- | --- | --- | --- | --- | --- | --- | --- | --- | --- | --- | --- | --- | --- | --- | --- | --- | --- | --- | --- | --- | --- | --- | --- | --- | --- | --- | --- | --- | --- | --- | --- | --- | --- | --- | --- | --- | --- | --- | --- | --- | --- | --- | --- | --- | --- | --- | --- | --- | --- | --- | --- | --- | --- | --- | --- | --- | --- | --- | --- | --- | --- | --- | --- | --- | --- | --- | --- | --- | --- | --- | --- | --- | --- | --- | --- | --- | --- | --- | --- | --- | --- | --- | --- | --- | --- | --- | --- | --- | --- | --- | --- | --- | --- | --- | --- | --- | --- | --- | --- | --- | --- | --- |
